# Supplementary figures and images for: Cross-mapping and the identification of editing sites in mature microRNAs in high-throughput sequencing libraries
Source: HighWire-hosted journal article supplement (doi:10.1101/gr.095273.109), 2010-01-05

# Supplemental Figure 3

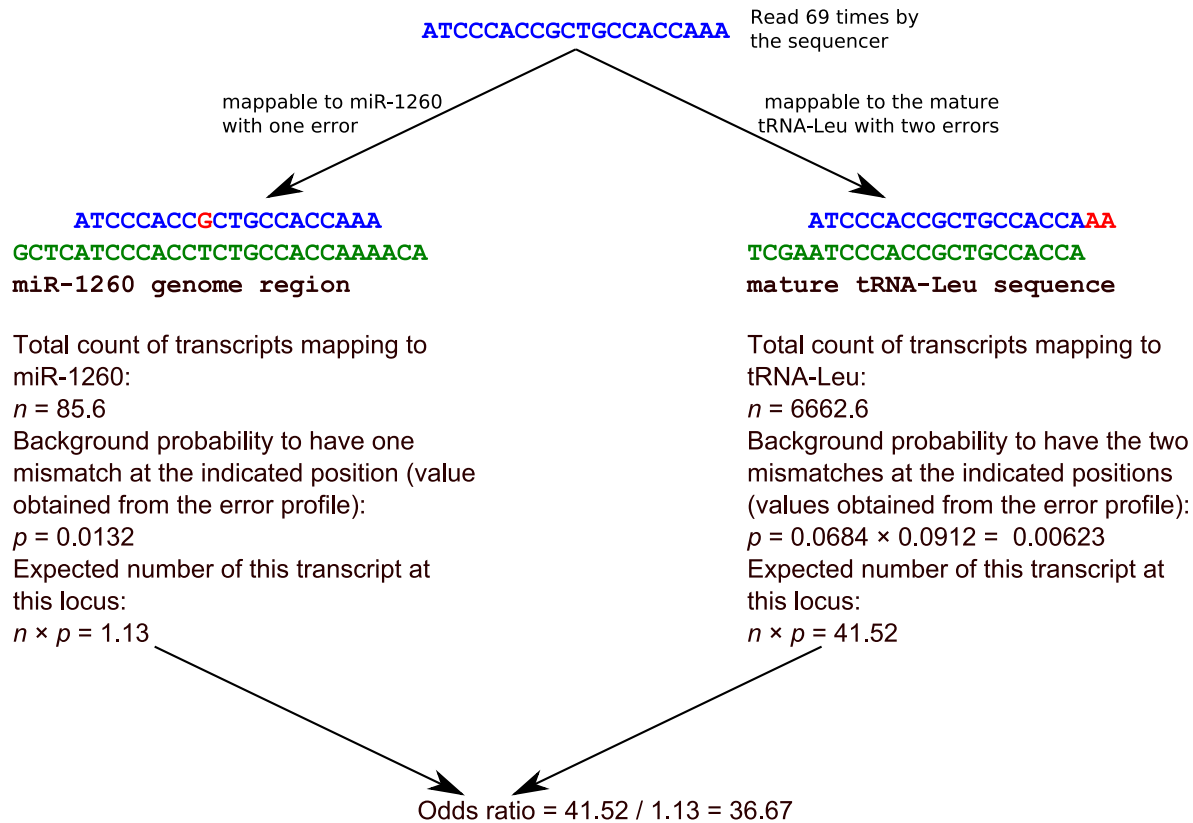

Supplement: SFigure3.pdf [file SFigure3.pdf]

# Supplemental Figure 4

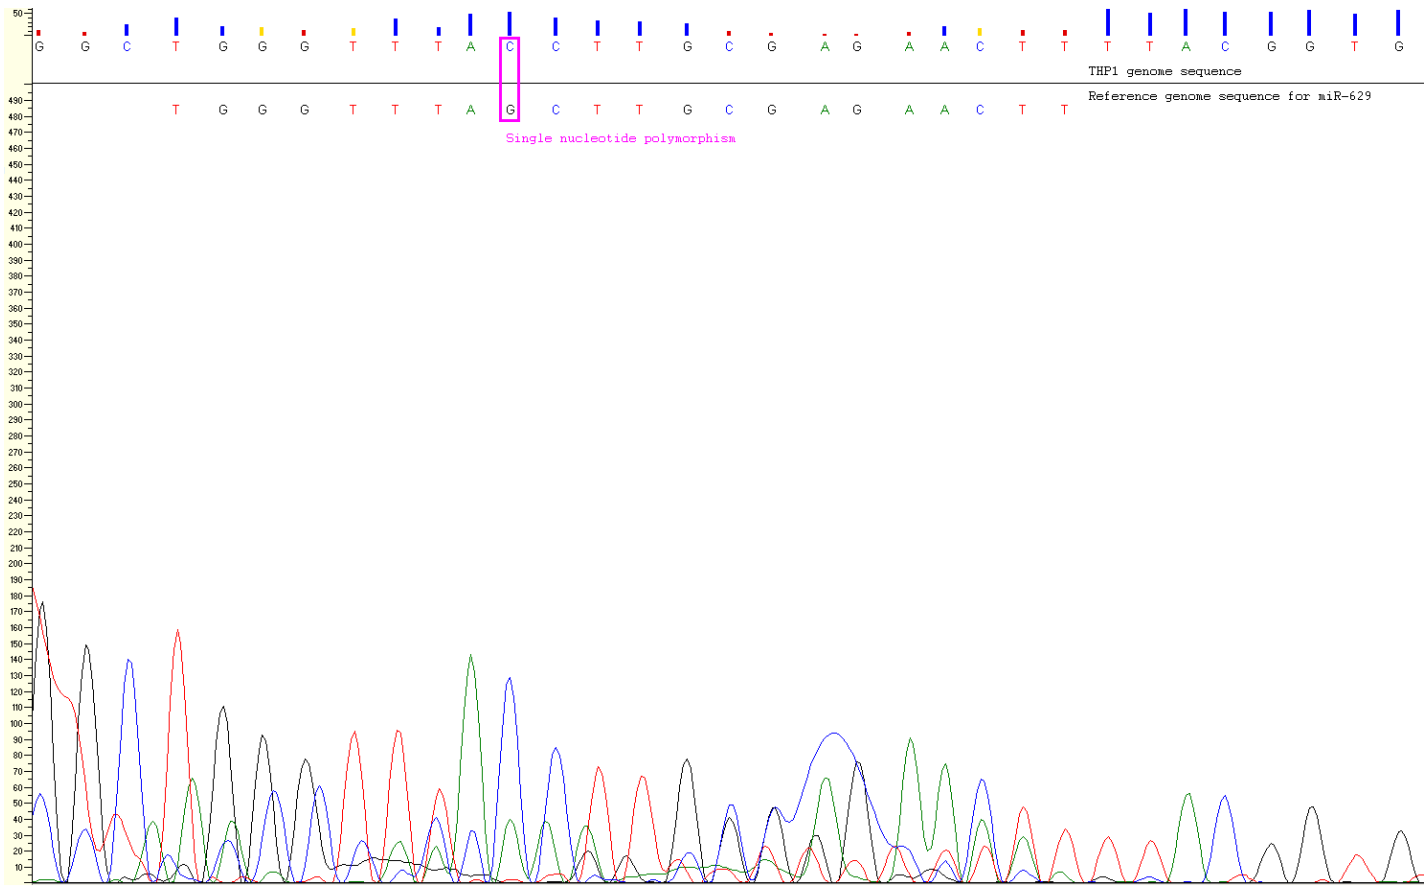

Supplement: SFigure4.pdf [file SFigure4.pdf]
